# Supplementary material for: Advancing Science while Training Undergraduates: Recommendations from a Collaborative Biology Research Network
Source: Atypon-hosted journal article supplement (doi:10.1187/cbe.20-05-0090), 2020-11-20
Supplement: combinedsupmats.pdf [file combinedsupmats.pdf]

# Supplemental Material

*CBE—Life Sciences Education*

Jensen-Ryan *et al.*

**Supplemental Information**  
**2018 Faculty Interview Guide**

A. *Expectations:*

1. What, would you say, was your original vision of the BRN?
2. We all know change is sometimes inevitable...has your vision of the BRN changed over time for you?
  - a. How so?
  - b. Why, would you say, it has or has not changed?
3. What were your original expectations with the BRN? Let's focus in on...
  - a. Science?
  - b. Students?
  - c. Network?
  - d. Other?
4. Did these expectations change over time?
  - a. How so?
  - b. Why did these expectations change?
5. As always, we're interested in the *expected and even unexpected* outcomes of the BRN.
  - i. Given your original expectations associated with science and the BRN, were your expectations met?
    - I. Were there any *unexpected* outcomes?
    - II. Did anything *surprise* you over time given your original scientific expectations?
    - III. What other thoughts might you have about the scientific outcomes associated with the BRN? [TENSION?]
  - ii. Given your original expectations associated with students and student involvement in the BRN, were your expectations met?
    - I. Were there any *unexpected* outcomes?
    - II. Did anything *surprise* you over time given your original student expectations?
    - III. What other thoughts might you have about the student outcomes associated with the BRN?
  - iii. Given your original expectations associated with the network in the BRN, were your expectations met?
    - I. Were there any *unexpected* outcomes?
    - II. Did anything *surprise* you given your original network expectations?
    - III. What other thoughts might you have about network outcomes associated with the BRN?
  - iv. Generally speaking, were there any other expectations you had with the BRN? Were these met or were there unexpected outcomes associated with these expectations?

- a. Finally, we're interested in the consequences and outcomes that resulted from how the BRN unfolded over time [prompt with each sub-category]?
  - i. How has this shaped:
    - I. The BRN's scientific goal?
    - II. The BRN's student trajectory and involvement?
    - III. The BRN's network?
    - IV. The other factors associated with the BRN?

B. *Lessons Learned*: Now that we have delved into expectations and outcomes, we'd like to reflect with you on lessons learned!

1. You sit down to reflect on the BRN, what pops into your mind for what you have learned?
  - a. What have you *personally* learned?
    - i. Science?
    - ii. Students?
    - iii. Network?
    - iv. Other?
  - b. What have you *professionally* learned?
    - i. Science?
    - ii. Students?
    - iii. Network?
    - iv. Other?
  - c. Is there anything you would have done differently?
2. As we take time to reflect, do you have any thoughts on how the BRN may have been completed differently?
  - i. Areas for improvement?
  - ii. Parts of the BRN that would remain?
  - iii. Parts of the BRN that would be discarded?
3. What advice would you give someone who might be thinking about participating in networked research?

C. *Dénouement*: Now that we have discuss expectations, outcomes, and lessons learned, how else do you want to reflect on the BRN?

## Faculty Interview Codes

| <b>Code Category</b> | <b>Code Name</b>                                                                     | <b>Brief Code Description</b>                                                                        |
|----------------------|--------------------------------------------------------------------------------------|------------------------------------------------------------------------------------------------------|
| <b>Synergy</b>       | SYN-REL-Institution                                                                  | Relationship synergy between faculty and institution in BRN                                          |
|                      | SYN-REL-Faculty                                                                      | Relationship synergy between/among faculty in BRN                                                    |
|                      | SYN-REL- Students                                                                    | Relationship synergy between/among faculty and students in BRN                                       |
|                      | SYN-REL-Staff                                                                        | Relationship synergy between/among faculty and hired staff (April, post-docs, grad students, etc.)   |
|                      | SYN-REL-Social Scientists                                                            | Relationship synergy between/among faculty and social scientists on project                          |
|                      | SYN-REL-Network                                                                      | Relationship synergy among network members generally                                                 |
|                      | SYN-SCI-Institution                                                                  | Scientific synergy between faculty and institution in BRN                                            |
|                      | SYN-SCI-Faculty                                                                      | Scientific synergy between/among faculty in BRN                                                      |
|                      | SYN-SCI-Students                                                                     | Scientific synergy between/among faculty and students in BRN                                         |
|                      | SYN-SCI-Staff                                                                        | Scientific synergy between/among faculty and hired staff (manager, post-docs, grad students, etc.)   |
|                      | SYN-SCI-Staff                                                                        | Scientific synergy among network members generally                                                   |
| <b>Tension</b>       | TEN-REL-Institution                                                                  | Tension between faculty and institution in BRN                                                       |
|                      | TEN-REL-Faculty                                                                      | Relationship tension between/among faculty in BRN                                                    |
|                      | TEN-REL- Students                                                                    | Relationship tension between/among faculty and students in BRN                                       |
|                      | TEN-REL-Staff                                                                        | Relationship tension between/among faculty and hired staff (manager, post-docs, grad students, etc.) |
|                      | TEN-SCI-Network                                                                      | Scientific tension among network members generally                                                   |
|                      | TEN-SCI-Institution                                                                  | Scientific tension between faculty and institution in BRN                                            |
|                      | TEN-SCI-Faculty                                                                      | Specific scientific tension between/among faculty in BRN                                             |
|                      | TEN-SCI-Students                                                                     | Scientific tension/constriction due to student participation in BRN                                  |
|                      | TEN-SCI-Staff                                                                        | Scientific tension/constriction due to staff participation in BRN                                    |
|                      | TEN-SCI-Amt. of Data                                                                 | Scientific tension in how to manage, report, etc. large amounts of data                              |
| TEN-SCI-Variability  | Scientific tension in network due to variation in scientific goals/vision of project |                                                                                                      |
| <b>Solution</b>      | SOL-Scientific                                                                       | Scientific recommendations to address issues in the                                                  |

|                |                   |                                                                                      |
|----------------|-------------------|--------------------------------------------------------------------------------------|
|                |                   | network                                                                              |
|                | SOL-Institution   | Institutional recommendations to address issues in the network                       |
|                | SOL-Faculty       | Faculty recommendations to address issues in the network                             |
|                | SOL-Students      | Student recommendations to address issues in the network                             |
|                | SOL-Staff         | Staffing recommendations to address issues in the network                            |
| <b>Other</b>   | CC-Paradox        | Paradox                                                                              |
|                | CC-Counterex      | Counter-example of any codes                                                         |
|                | CC-Quote          | Great quote                                                                          |
| <b>General</b> | GEN-REL-Success   | General discussion of relationships being successful in the network                  |
|                | GEN-SCI-Future    | General discussion of where faculty member thinks the science is going in the future |
|                | GEN-SCI-Success   | General discussion of science being successful in the network                        |
|                | GEN-SCI-UnSuccess | General discussion of science being unsuccessful in the network                      |
